# Supplementary material for: Genome-wide identification and functional analysis of lincRNAs acting as miRNA targets or decoys in maize
Source: PubMed Central journal article supplement (PMC4608266; doi:10.1186/s12864-015-2024-0), 2015-10-15

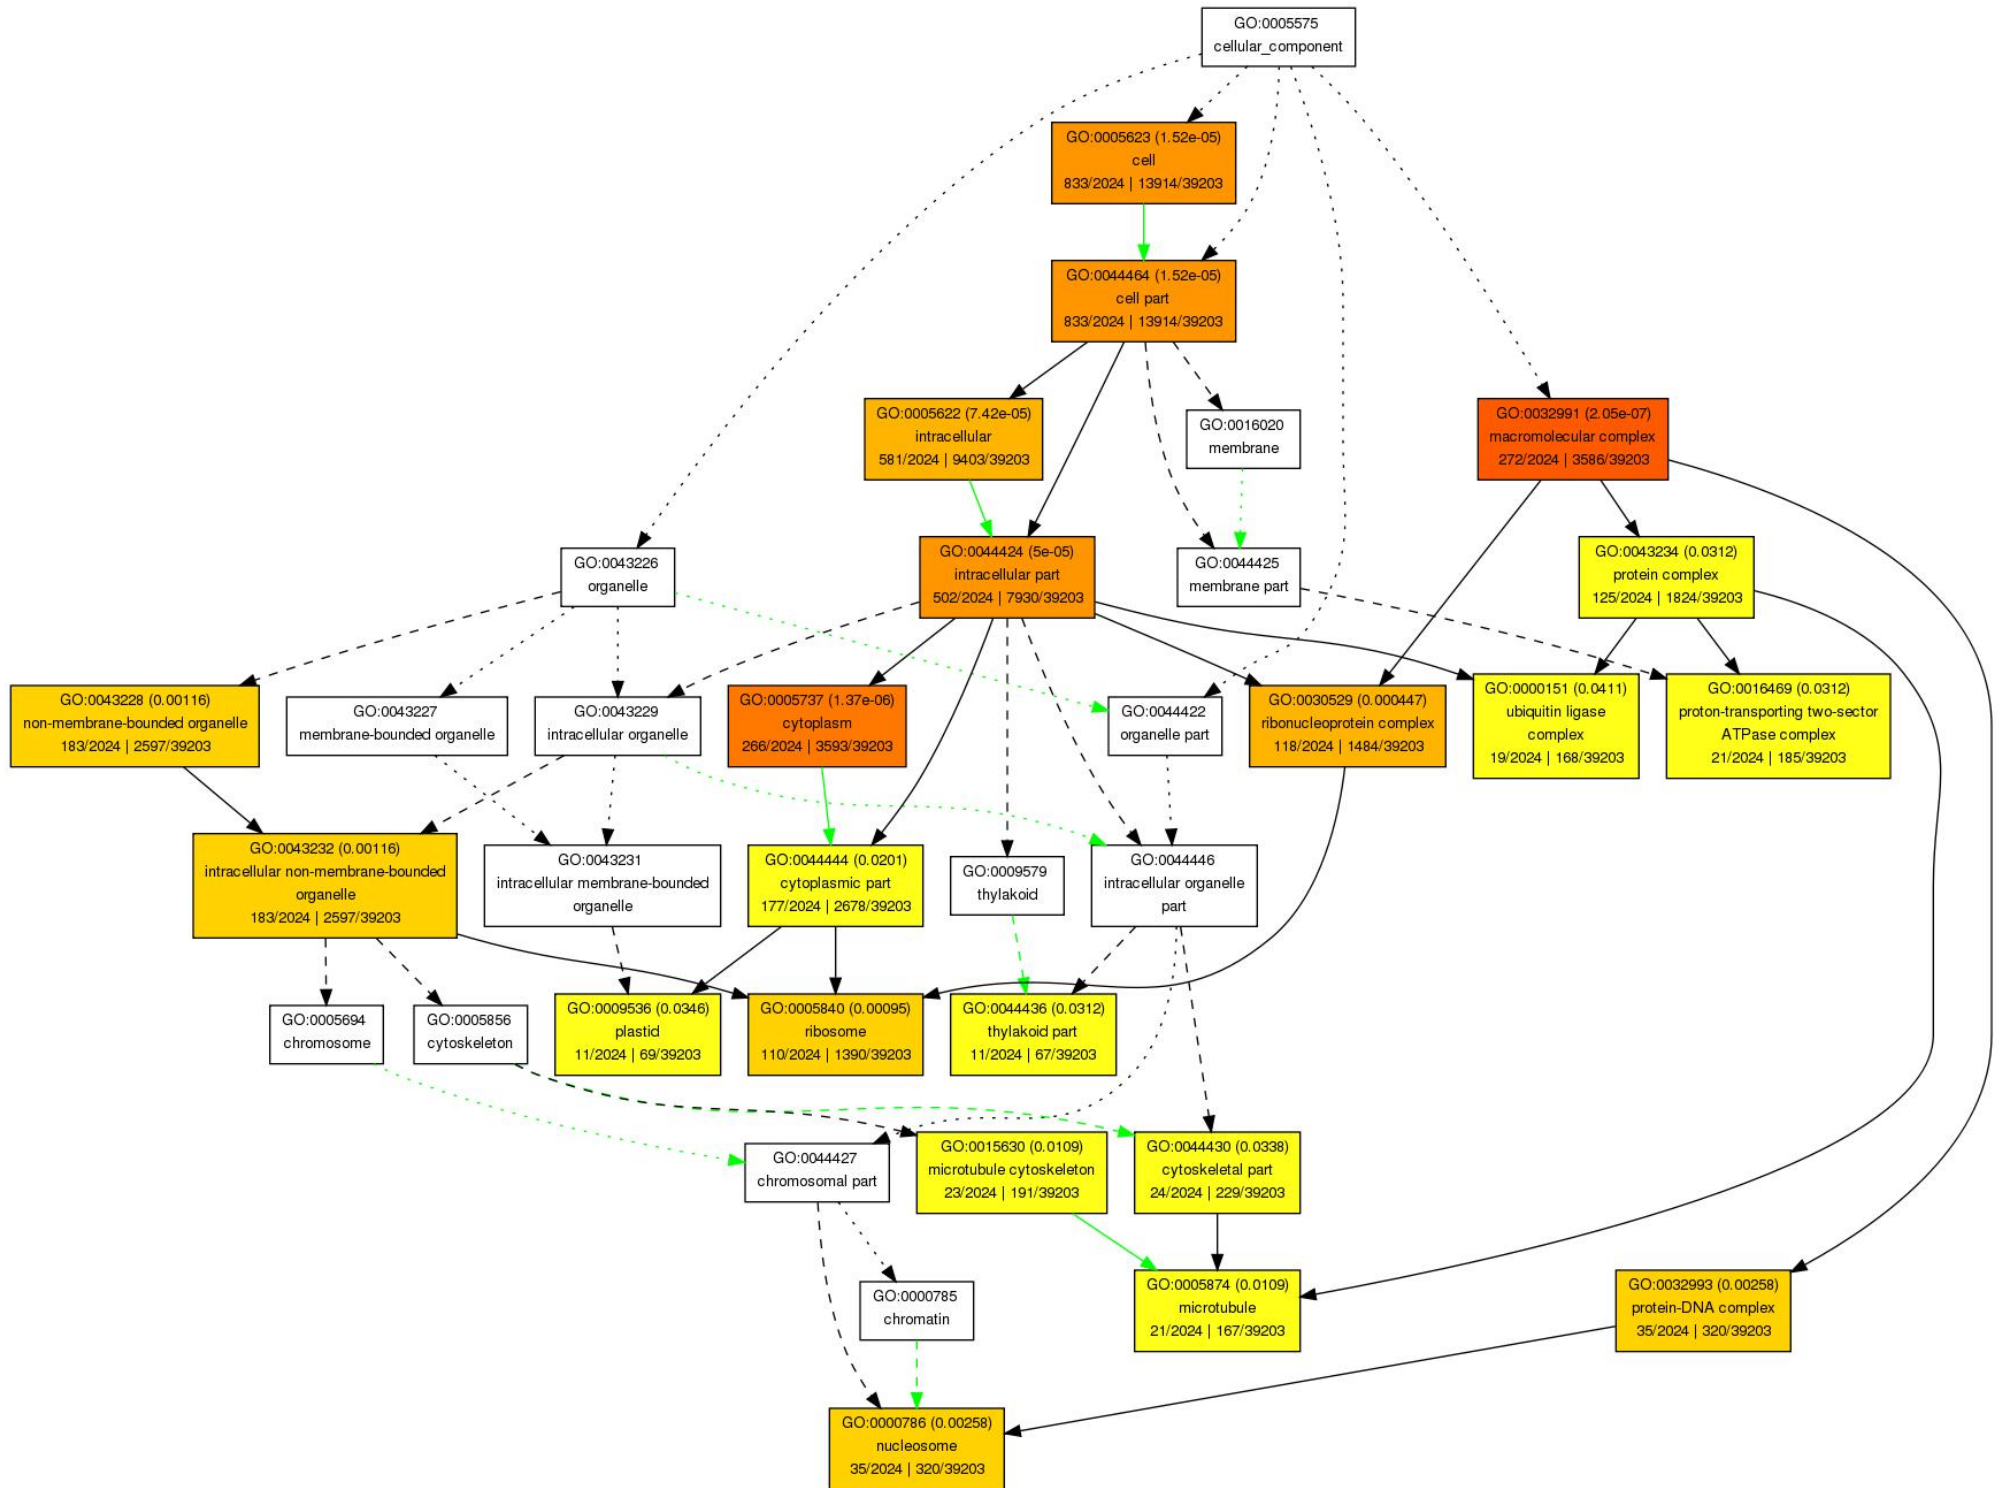

Supplement: 12864_2015_2024_MOESM17_ESM.pdf [file 12864_2015_2024_MOESM17_ESM.pdf]
